# Supplementary material for: Trivalent Cations Detection of Magnetic-Sensitive Microcapsules by Controlled-Release Fluorescence Off-On Sensor
Source: MDPI journal article supplement (doi:10.3390/nano11071801), 2021-07-10
Supplement: s1 [file s1]

Supplementary Materials

# Trivalent Cations Detection of Magnetic-Sensitive Microcapsules by Controlled-Release Fluorescence Off-On Sensor

Bo-Wei Du <sup>1</sup>, Ching-Chang Lin <sup>2</sup> and Fu-Hsiang Ko <sup>1,\*</sup>

<sup>1</sup> Department of Materials Science and Engineering, National Yang Ming Chiao Tung University, Hsinchu 30010, Taiwan; duu.mse04g@nctu.edu.tw

<sup>2</sup> Research Center for Advanced Science and Technology (RCAST), The University of Tokyo, Tokyo 153-8904, Japan; Lin@dsc.rcast.u-tokyo.ac.jp

\* Correspondence: fhko@mail.nctu.edu.tw; Tel.: +886-35712121 (ext. 55803)

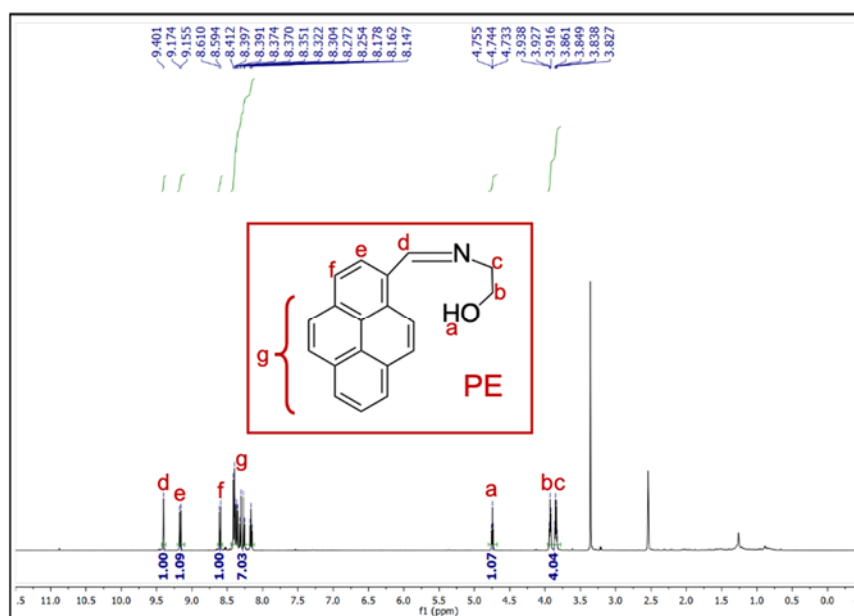

Figure S1. <sup>1</sup>H NMR spectrum of PE in DMSO.

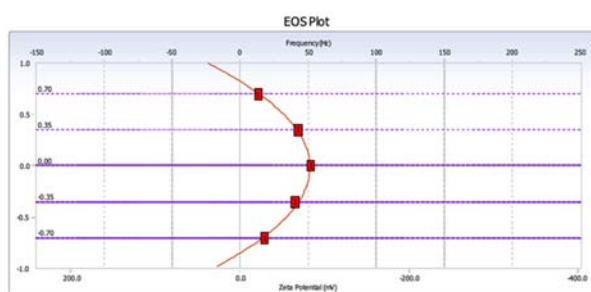

## Measurement Results

|                |               |                       |                |         |      |
|----------------|---------------|-----------------------|----------------|---------|------|
| Zeta Potential | : -33.52      | (mV)                  | Doppler shift  | : 20.81 | (Hz) |
| Mobility       | : -2.614e-004 | (cm <sup>2</sup> /Vs) | Base Frequency | : 125.0 | (Hz) |
| Conductivity   | : 0.0211      | (mS/cm)               |                |         |      |

Figure S2. Zeta potential measure of magnetic nanoparticles (MNPs).

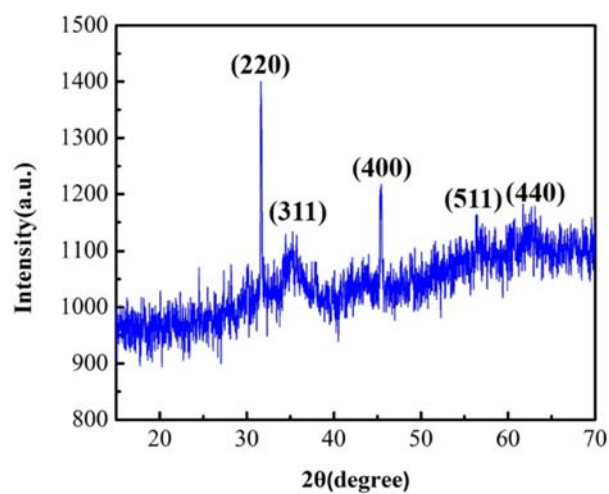

**Figure S3.** The X-ray diffraction pattern of MNPs.

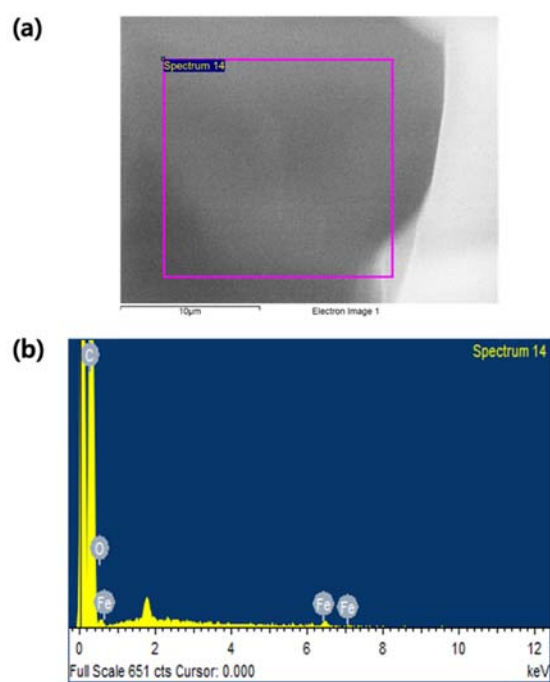

| Element | Weight% | Atomic% |
|---------|---------|---------|
| C k     | 94.07   | 96.89   |
| O k     | 3.25    | 2.51    |
| Fe k    | 2.68    | 0.59    |
| Total   | 100.00  | 99.99   |

**Figure S4.** (a) and (b) The EDS spectrum and elemental quantitative data of PE/MNPs microcapsules.

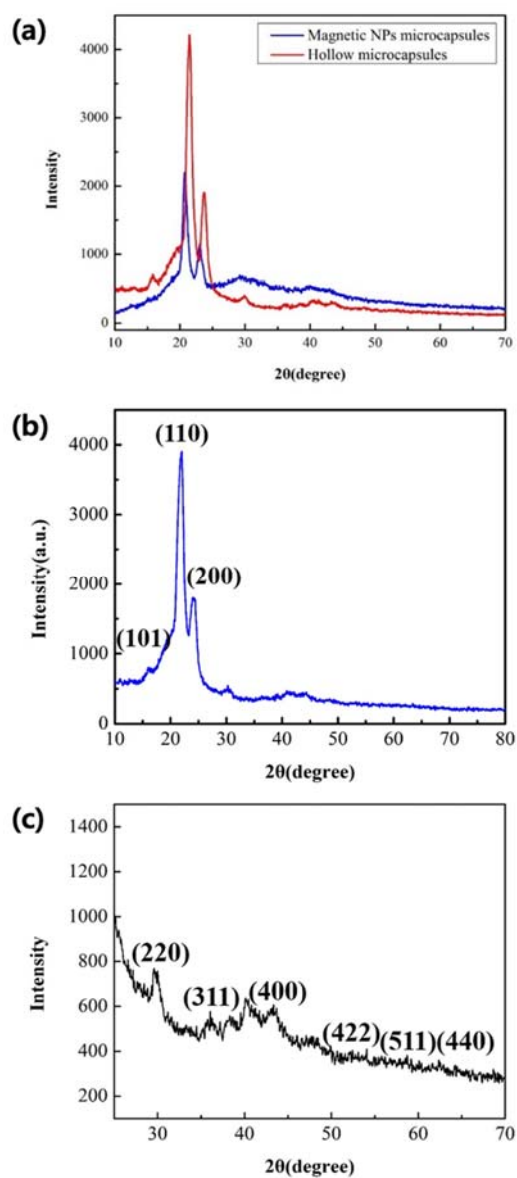

**Figure S5.** Characterization analysis of (a) PE/MNPs microcapsules and hollow microcapsules. (b) and (c) PE/MNPs microcapsules.
